# Supplementary material
Source: bioRxiv or medRxiv preprint supplement (https://www.biorxiv.org/highwire/filestream/52704/field_highwire_adjunct_files/10/070730-2.pdf)

# Supplementary Figure 2

|        |        |        |        |        |        |        |        |        |        |        |        |        |       |       |        |        |        |        |                             |
|--------|--------|--------|--------|--------|--------|--------|--------|--------|--------|--------|--------|--------|-------|-------|--------|--------|--------|--------|-----------------------------|
| 0.12*  | 0.3*   | 0.38** | 0.28   | 0.28** | 0.24** | 0.04   | 0.01   | -0.06  | 0.07   | -0.02  | -0.05  | 0.06   | 0.17  | 0.15  | 0.31   | 0.34** | 0.04   |        | Rheumatoid Arthritis        |
| 0.25   | -0.03  | -0.03  | 0      | 0.22*  | 0.23*  | -0.01  | 0      | 0.24   | 0.01   | 0.16   | -0.05  | 0.32** | 0.02  | -0.04 | 0.08   | 0.13   |        | 0.04   | Psoriasis                   |
| 0.07   | 0.4**  | 0.03   | 0.12   | 0.24*  | 0.38** | 0.2**  | -0.16  | 0.18   | 0.13*  | 0      | 0.05   | -0.01  | -0.09 | 0.15  | 0.11   |        | 0.13   | 0.34** | Hypothyroidism              |
| 0.18   | 0.55** | 0.05   | 0.45   | 0.36   | 0.27   | -0.05  | -0.03  | 0.77   | -0.16  | 0.25   | -0.04  | -0.02  | 0.38  | -0.15 |        | 0.11   | 0.08   | 0.31   | Autoimmune Hepatitis        |
| 0.3*   | 0.09   | 0.09   | 0.19   | 0.15   | 0.11   | 0.22*  | 0.08   | 0.18   | -0.12  | -0.07  | 0.05   | 0.21*  | 0.01  |       | -0.15  | 0.15   | -0.04  | 0.15   | Tuberculosis Susceptibility |
| 0.47*  | 0.16   | 0.18   | 0.52*  | 0.31   | -0.09  | 0.12   | 0.1    | 0.22   | 0.07   | 0.18   | 0.13   | 0.19   |       | 0.01  | 0.38   | -0.09  | 0.02   | 0.17   | Multiple Sclerosis          |
| 0.69** | -0.05  | -0.15  | 0.05   | 0.24** | 0.27** | 0.06   | 0.19*  | -0.13  | 0.03   | 0.11   | -0.02  |        | 0.19  | 0.21* | -0.02  | -0.01  | 0.32** | 0.06   | Crohn's Disease             |
| -0.03  | -0.01  | 0.04   | -0.09  | 0.04   | 0.15   | 0.79** | 0.39** | -0.02  | 0.14** | 0.17** |        | -0.02  | 0.13  | 0.05  | -0.04  | 0.05   | -0.05  | -0.05  | Asthma                      |
| -0.13  | -0.02  | -0.06  | 0.04   | 0.12   | 0.01   | 0.13** | 0.23*  | 0.13   | 0.06   |        | 0.17** | 0.11   | 0.18  | -0.07 | 0.25   | 0      | 0.16   | -0.02  | C-Reactive Protein          |
| 0      | 0.02   | 0.01   | 0      | 0.02   | 0.16*  | 0.22** | 0.02   | -0.03  |        | 0.06   | 0.14** | 0.03   | 0.07  | -0.12 | -0.16  | 0.13*  | 0.01   | 0.07   | Childhood Ear Infection     |
| -0.05  | -0.08  | -0.51  | 0.03   | 0.05   | 0.11   | -0.25* | -0.02  |        | -0.03  | 0.13   | -0.02  | -0.13  | 0.22  | 0.18  | 0.77   | 0.18   | 0.24   | -0.06  | Eosinophilic Esophagitis    |
| 0.09   | -0.17  | 0.05   | -0.04  | 0.06   | 0.22   | 0.25** |        | -0.02  | 0.02   | 0.23*  | 0.39** | 0.19*  | 0.1   | 0.08  | -0.03  | -0.16  | 0      | 0.01   | Atopic Dermatitis           |
| 0.04   | 0.02   | -0.07  | -0.01  | 0.05   | 0.19** |        | 0.25** | -0.25* | 0.22** | 0.13** | 0.79** | 0.06   | 0.12  | 0.22* | -0.05  | 0.2**  | -0.01  | 0.04   | Allergy (Any)               |
| 0.23*  | 0.32** | 0.39*  | 0.21*  | 0.03   |        | 0.19** | 0.22   | 0.11   | 0.16*  | 0.01   | 0.15   | 0.27** | -0.09 | 0.11  | 0.27   | 0.38** | 0.23*  | 0.24** | Celiac Disease              |
| 0.32** | 0      | 0.95** | 0.37   |        | 0.03   | 0.05   | 0.06   | 0.05   | 0.02   | 0.12   | 0.04   | 0.24** | 0.31  | 0.15  | 0.36   | 0.24*  | 0.22*  | 0.28** | Primary Biliary Cirrhosis   |
| 0.11   | 0.48*  | 0.61** |        | 0.37   | 0.21*  | -0.01  | -0.04  | 0.03   | 0      | 0.04   | -0.09  | 0.05   | 0.52* | 0.19  | 0.45   | 0.12   | 0      | 0.28   | System Lupus Erythematosus  |
| 0.18   | 0.08   |        | 0.61** | 0.95** | 0.39*  | -0.07  | 0.05   | -0.51  | 0.01   | -0.06  | 0.04   | -0.15  | 0.18  | 0.09  | 0.05   | 0.03   | -0.03  | 0.38** | Systemic Sclerosis          |
| 0.15   |        | 0.08   | 0.48*  | 0      | 0.32** | 0.02   | -0.17  | -0.08  | 0.02   | -0.02  | -0.01  | -0.05  | 0.16  | 0.09  | 0.55** | 0.4**  | -0.03  | 0.3*   | Type 1 Diabetes             |
|        | 0.15   | 0.18   | 0.11   | 0.32** | 0.23*  | 0.04   | 0.09   | -0.05  | 0      | -0.13  | -0.03  | 0.69** | 0.47* | 0.3*  | 0.18   | 0.07   | 0.25   | 0.12*  | Ulcerative Colitis          |

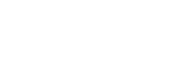

Supplement: Supplementary file [file 070730-2.pdf]
